# Supplementary material for: In situ formation of gold nanoparticles on magnetic halloysite nanotubes via polydopamine chemistry for highly effective and recyclable catalysis
Source: Royal Society of Chemistry journal article supplement (doi:10.1039/c6ra02789j), 2016-01-01
Supplement: c6ra02789j1.pdf [file c6ra02789j1.pdf]

## Supporting Information

### In Situ Formation of Gold Nanoparticles on Magnetic Halloysite Nanotubes via Polydopamine Chemistry for Highly Effective and Recyclable Catalysis

Qiangbing Wei\*, Ruirong Shi, Dedai Lu, Ziqiang Lei\*

*Key Laboratory of Eco-Environmental-Related Polymer Materials, Ministry of Education, Key Laboratory of Polymer Materials of Gansu Province, College of Chemistry and Chemical Engineering, Northwest Normal University, Lanzhou 730070, P. R. China*

Corresponding authors: weiqiangbing@nwnu.edu.cn; leizq@nwnu.edu.cn

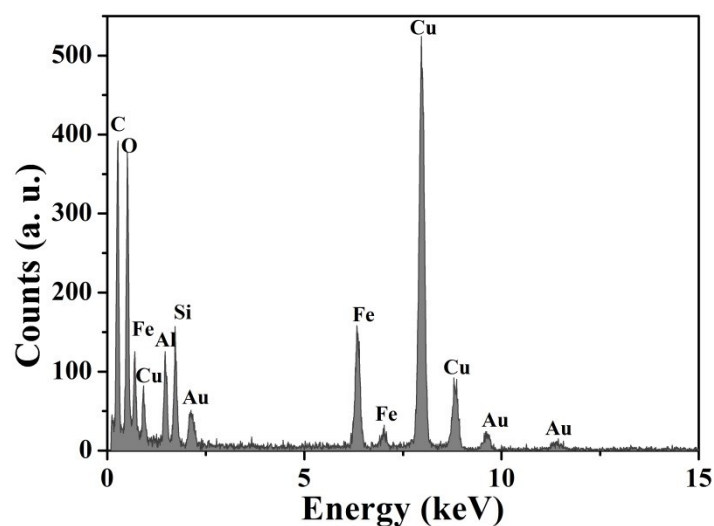

Figure S1. EDX spectrum of MHNTs-PDA-Au composite

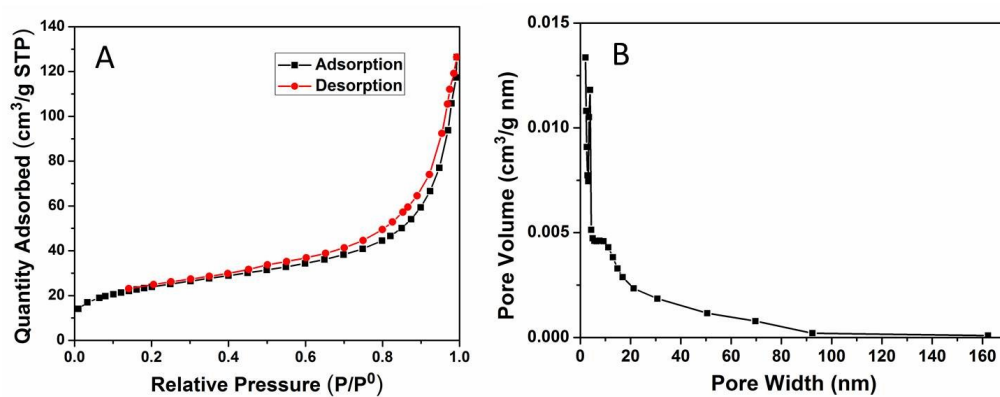

Figure S2. N<sub>2</sub> adsorption-desorption isotherms (A) and the pore width distribution curve obtained from the desorption data through the BJH method (B).

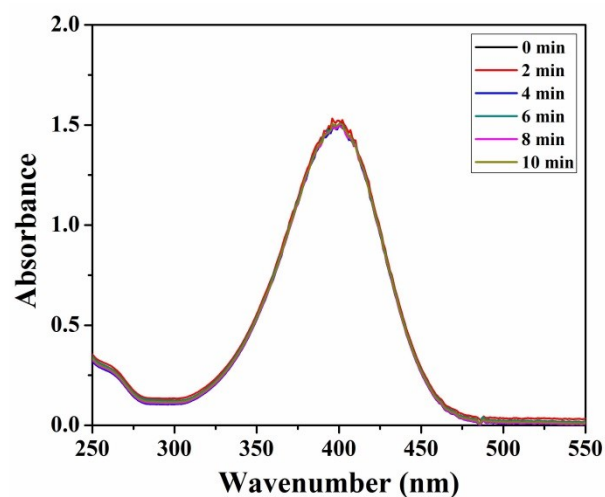

FigureS3. Time-dependent of UV-vis spectra changes of 4-NP in the presence of MHNTs-PDA

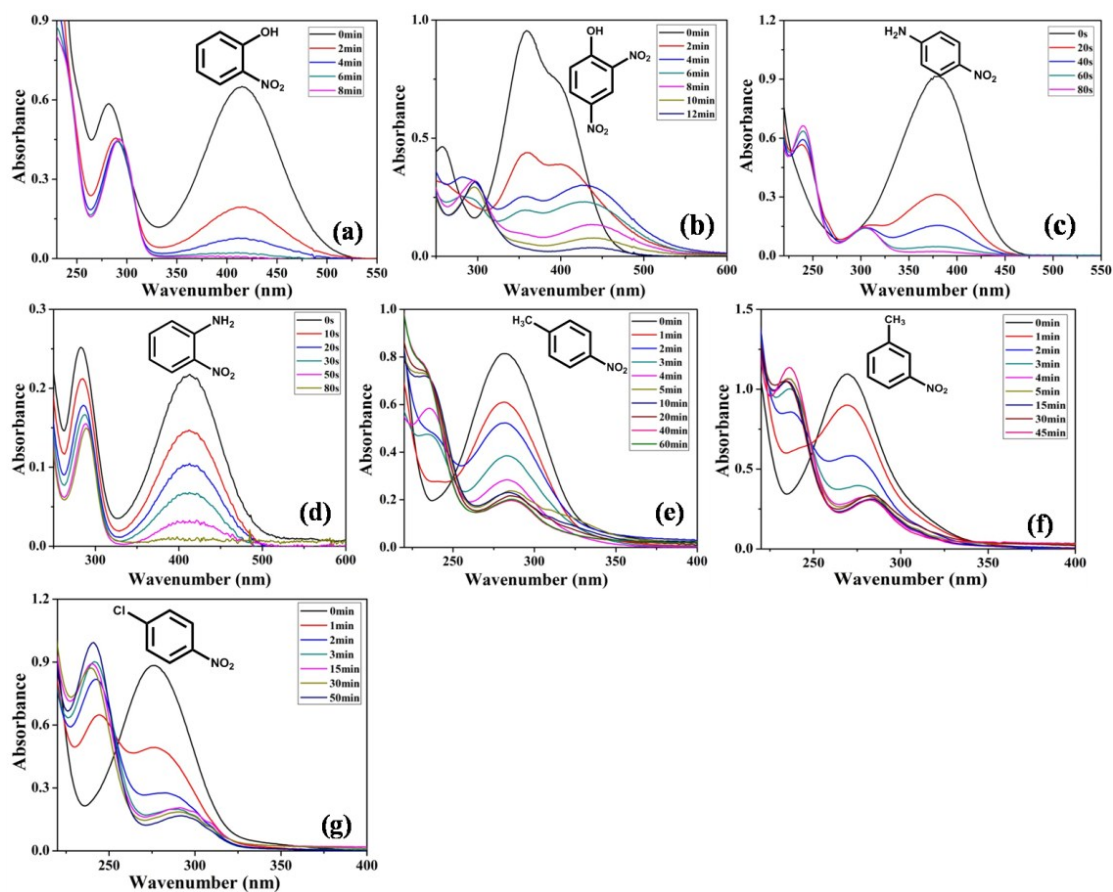

Figure S4. Time-dependent of UV-vis spectra changes of various nitrobenzene derivatives in the presence of MHNTs-PDA-Au.

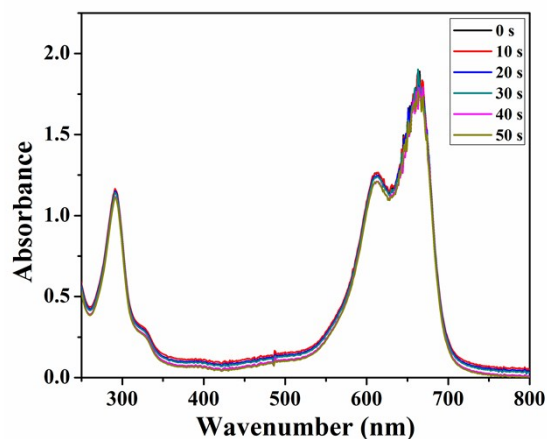

Figure S5. Time-dependent of UV-vis spectra changes of MB in the presence of MHNTs-PDA

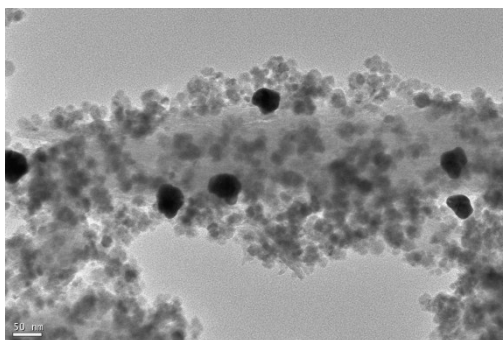

Figure S6. TEM image of MHNTs-PDA-Au after recycling for eight cycles in the reduction of 4-nitrophenol.

Table S1. Comparison of rate constant for nitrophenol reduction of supported Au nanocatalysts.

| Catalyst                                           | Moles of nitrophenol     | Content of Supported Au /g | Required time | $k /s^{-1}$           | Ref.      |
|----------------------------------------------------|--------------------------|----------------------------|---------------|-----------------------|-----------|
| MHNTs-PDA-Au                                       | $1.5 \times 10^{-7}$ mol | $5.8 \times 10^{-6}$       | 10 min        | $7.4 \times 10^{-3}$  | This work |
| Au@SiO <sub>2</sub> NPs                            | $2.0 \times 10^{-7}$ mol | $2.7 \times 10^{-5}$       | 33 min        | $1.9 \times 10^{-3}$  | 1         |
| Au/graphene hydrogel                               | $2.8 \times 10^{-7}$ mol | $2.4 \times 10^{-5}$       | 12 min        | $3.1 \times 10^{-3}$  | 2         |
| Fe <sub>3</sub> O <sub>4</sub> @P(EGDMA-co-MAA)/Au | $7.5 \times 10^{-7}$ mol | $4.5 \times 10^{-5}$       | 3 min         | $5.9 \times 10^{-3}$  | 3         |
| dumbbell-like Fe <sub>3</sub> O <sub>4</sub> -Au   | $4.0 \times 10^{-7}$ mol | $3.8-9.6 \times 10^{-4}$   | 10 min        | $10.5 \times 10^{-3}$ | 4         |

Table S2. Comparison of rate constant for methylene blue (MB) reduction of supported Au nanocatalysts.

| Catalyst                              | Mass of MB/g          | Content of Supported Au /g | Required time | $k /s^{-1}$           | Ref.      |
|---------------------------------------|-----------------------|----------------------------|---------------|-----------------------|-----------|
| MHNTs-PDA-Au                          | $6.0 \times 10^{-5}$  | $1.16 \times 10^{-5}$      | 50 s          | $8.0 \times 10^{-2}$  | This work |
| Au@ppy/Fe <sub>3</sub> O <sub>4</sub> | $6.0 \times 10^{-5}$  | $4.6 \times 10^{-5}$       | 42 min        | $4.4 \times 10^{-3}$  | 5         |
| Au@TA-GH                              | $20.0 \times 10^{-5}$ | $3.2 \times 10^{-5}$       | 9 min         | $5.16 \times 10^{-3}$ | 6         |

**References:**

1. Z. Wang, H. Fu, D. Han and F. Gu, *J. Mater. Chem. A*, 2014, 2, 20374-20381.
2. J. Li, C. Y. Liu and Y. Liu, *J. Mater. Chem.*, 2012, 22, 8426-8430
3. H. Woo and K. H. Park, *Catal. Commun.*, 2014, 46, 133-137.
4. F. H. Lin and R. A. Doong, *J. Phys. Chem. C*, 2011, 115, 6591-6598.
5. T. Yao, T. Cui, H. Wang, L. Xu, F. Cui and J. Wu, *Nanoscale*, 2014, 6, 7666-7674.
6. J. Luo, N. Zhang, J. Lai, R. Liu and X. Liu, *J. Hazard. Mater.*, 2015, 300, 615-623.
